# Supplementary material
Source: PubMed Central journal article supplement (PMC2449351)
Supplement: 0802201105_Supplemental_PDF.pdf [file 0802201105_Supplemental_PDF.pdf]

# Supporting Information

Baugh *et al.* 10.1073/pnas.0802201105

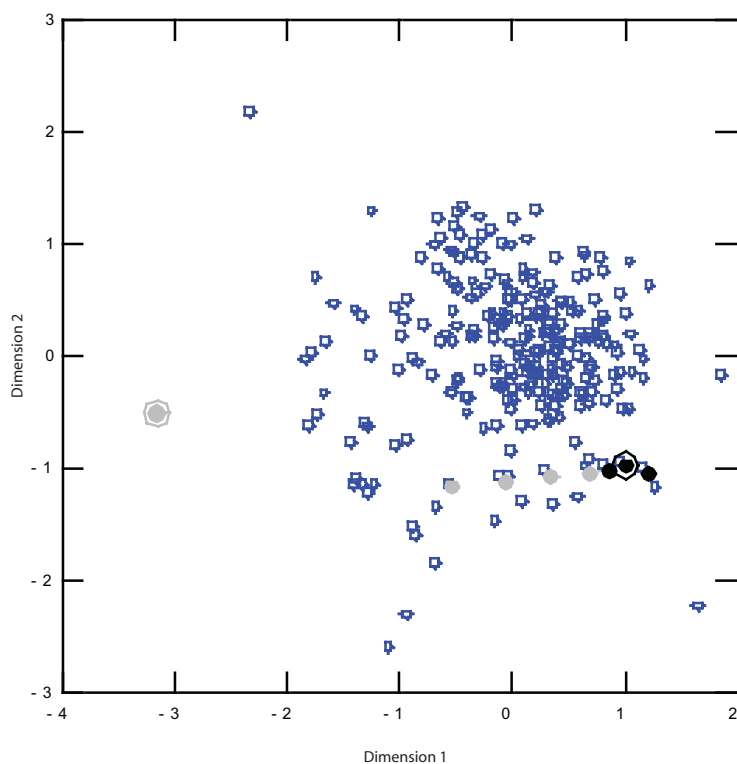

**Fig. S1.** A multiple-dimensional scaling plot of 300 calls from 50 males (blue open symbols; see ref. 1) from Gamboa, Panamá, where females for this study were collected. The filled circles are calls from the PC transect with which females were tested [except for the *P. coloradorum* call, which is given as a reference (see below)]. Black-filled circles are calls that females classify as conspecific and gray-filled circles are those that were classified as not conspecific. The circles with halos are the synthetic *P. pustulosus* (black) and *P. coloradorum* (gray) calls. The graph further highlights a general conclusion of the study that similarity of male calls does not simply predict the responses of females.

1. Ryan MJ, Rand W, Hurd PL, Phelps SM, Rand AS (2003) Generalization in response to mate recognition signals. *Am Nat* 161:380–394.

**Table S1. The mean values of fundamental frequency parameters for nine stimuli used in this study**

| Stimulus | Maximum frequency, Hz | Final frequency, Hz | Rise time, ms | Fall time, ms | Frequency sweep shape | Fall shape | Rise shape |
|----------|-----------------------|---------------------|---------------|---------------|-----------------------|------------|------------|
| PC-6     | 866                   | 475                 | 22.24         | 353.88        | 0.34                  | 0.47       | 0.32       |
| PC00     | 884                   | 484                 | 24.00         | 343.00        | 0.34                  | 0.48       | 0.33       |
| PC6      | 893                   | 493                 | 25.76         | 332.12        | 0.34                  | 0.49       | 0.34       |
| PC12     | 920                   | 501                 | 27.53         | 321.24        | 0.35                  | 0.51       | 0.34       |
| PC18     | 937                   | 510                 | 29.29         | 310.37        | 0.35                  | 0.52       | 0.35       |
| PC25     | 958                   | 520                 | 31.35         | 297.68        | 0.35                  | 0.54       | 0.36       |
| PC31     | 976                   | 529                 | 33.11         | 286.80        | 0.35                  | 0.55       | 0.36       |
| PC37     | 994                   | 537                 | 34.88         | 275.92        | 0.36                  | 0.56       | 0.37       |
| PC50     | 1032                  | 556                 | 38.70         | 252.35        | 0.36                  | 0.59       | 0.38       |
| PC100    | 1180                  | 628                 | 53.40         | 161.70        | 0.39                  | 0.71       | 0.44       |

Stimulus PC100 was not used in this study but is shown here for comparison.
